# Supplementary material for: Designing photoaffinity tool compounds for the investigation of the DENV NS2B–NS3 protease allosteric binding pocket
Source: Royal Society of Chemistry journal article supplement (doi:10.1039/d3md00331k), 2023-01-01
Supplement: d3md00331k1.pdf [file d3md00331k1.pdf]

# Supporting Information

## Designing Photoaffinity Tool Compounds for the Investigation of the DENV NS2B-NS3 Protease Allosteric Binding Pocket

Hannah Maus<sup>a</sup>, Andrea Gellert<sup>a</sup>, Olivia Englert<sup>a</sup>, Jia-Xuan Chen<sup>b</sup>, Tanja Schirmeister<sup>a</sup>, Fabian Barthels<sup>\*,a</sup>

<sup>a</sup> Johannes Gutenberg-University Mainz, IPBS, Staudingerweg 5, 55128 Mainz, Germany

<sup>b</sup> Johannes Gutenberg-University Mainz, IMB, Ackermannweg 4, 55128 Mainz, Germany

\* Corresponding author, barthels@uni-mainz.de

### Content

#### Inhalt

|                                              |    |
|----------------------------------------------|----|
| Scans of SDS-PAGE gels.....                  | 1  |
| IC <sub>50</sub> curves and Dixon Plot ..... | 2  |
| NMR Spectra.....                             | 4  |
| HPLC Chromatograms.....                      | 10 |

### Scans of SDS-PAGE gels

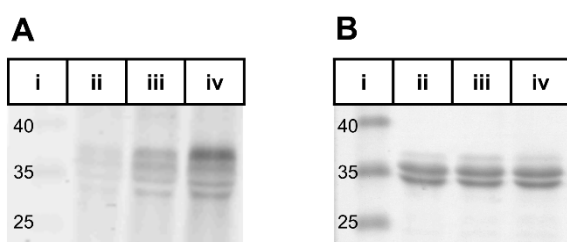

**Figure S1.** Scans of SDS-PAGE gels of PAL experiments with DENV NS2B-NS3 protease. **A** Typhoon scan of the gel. i) marker; ii) blind: DENV NS2B-NS3; iii) blind: DENV NS2B-NS3 + **4**; iv) irr: DENV NS2B-NS3 + **4**. **B** Scan of the Coomassie stained gel. i) marker; ii) blind: DENV NS2B-NS3; iii) blind: DENV NS2B-NS3 + **4**; iv) irr: DENV NS2B-NS3 + **4**.

## IC<sub>50</sub> curves and Dixon Plot

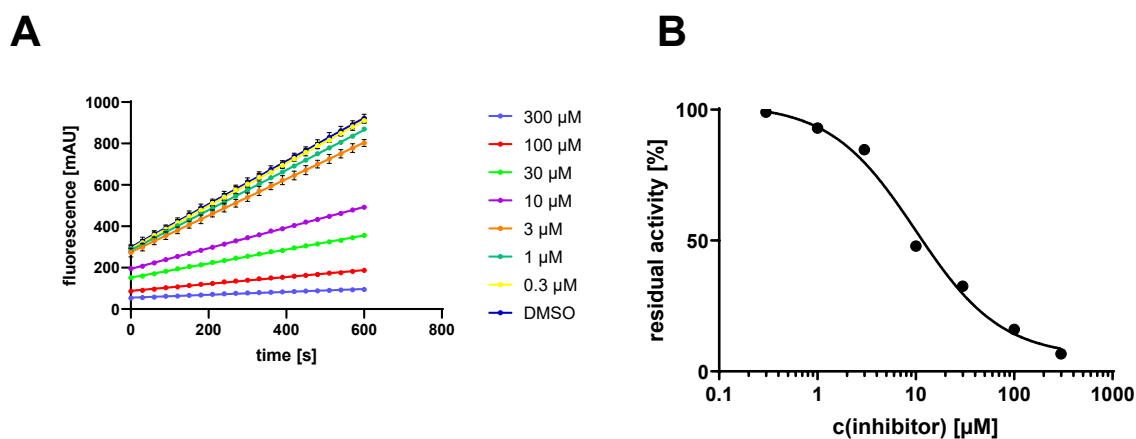

**Figure S2.** Fluorometric assay of compound **2**. **A** Fluorescence Increase over 600 s with different concentrations of compound **2**. **B** IC<sub>50</sub> curve of compound **2**. The IC<sub>50</sub> was determined to be  $9.97 \pm 0.87 \mu\text{M}$ .

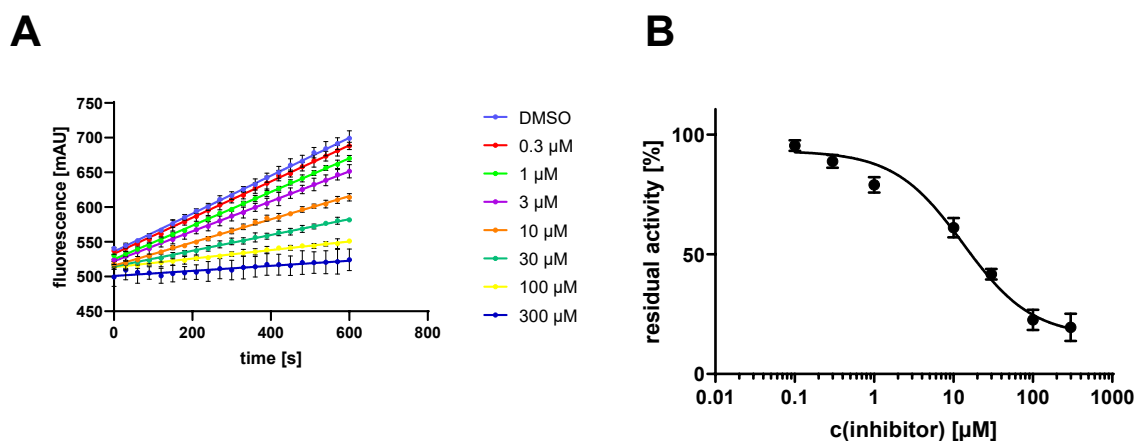

**Figure S3.** Fluorometric assay of compound **3a**. **A** Fluorescence Increase over 600 s with different concentrations of compound **3a**. **B** IC<sub>50</sub> curve of compound **3a**. The IC<sub>50</sub> was determined to be  $13.4 \pm 2.1 \mu\text{M}$ .

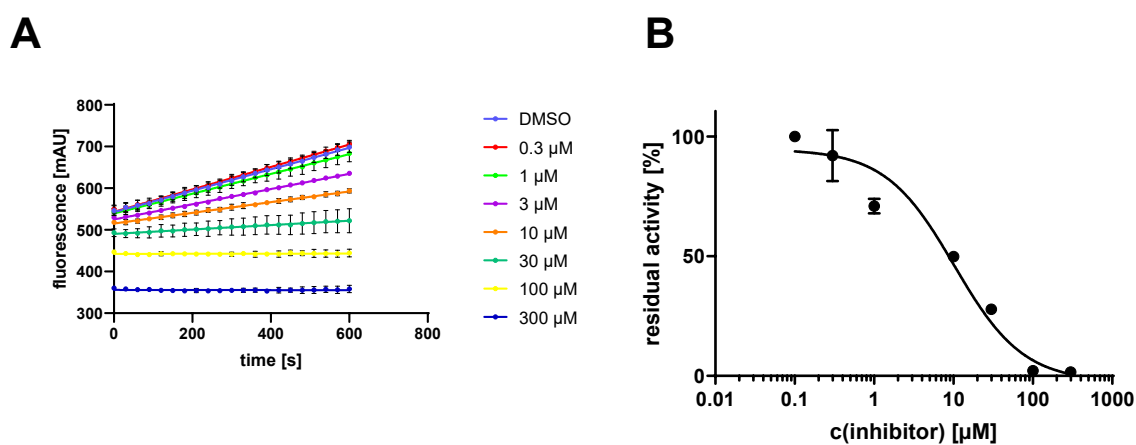

**Figure S4.** Fluorometric assay of compound **3b**. **A** Fluorescence Increase over 600 s with different concentrations of compound **3b**. **B** IC<sub>50</sub> curve of compound **3b**. The IC<sub>50</sub> was determined to be  $10.2 \pm 1.5 \mu\text{M}$ .

**A**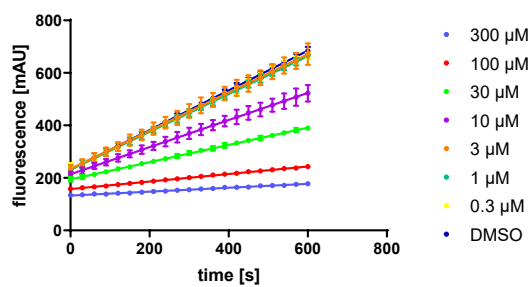**B**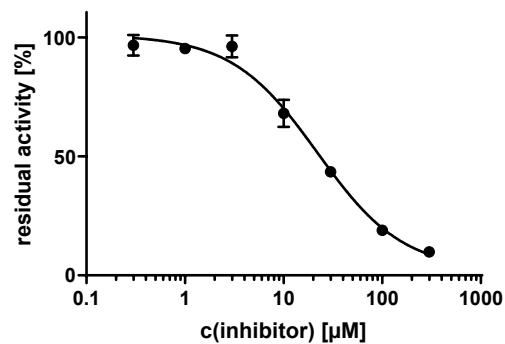

**Figure S5.** Fluorometric assay of compound 3c. **A** Fluorescence Increase over 600 s with different concentrations of compound 3c. **B** IC<sub>50</sub> curve of compound 3c. The IC<sub>50</sub> was determined to be 20.0  $\pm$  2.0  $\mu$ M.

**A**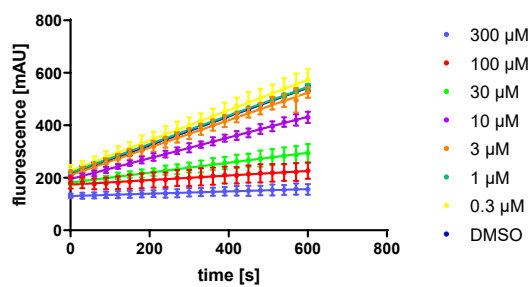**B**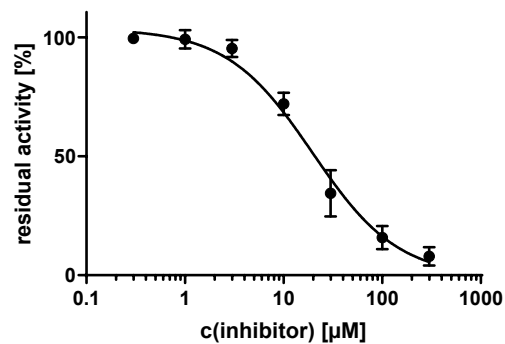

**Figure S6.** Fluorometric assay of compound 4. **A** Fluorescence Increase over 600 s with different concentrations of compound 4. **B** IC<sub>50</sub> curve of compound 4. The IC<sub>50</sub> was determined to be 17.0  $\pm$  1.3  $\mu$ M.

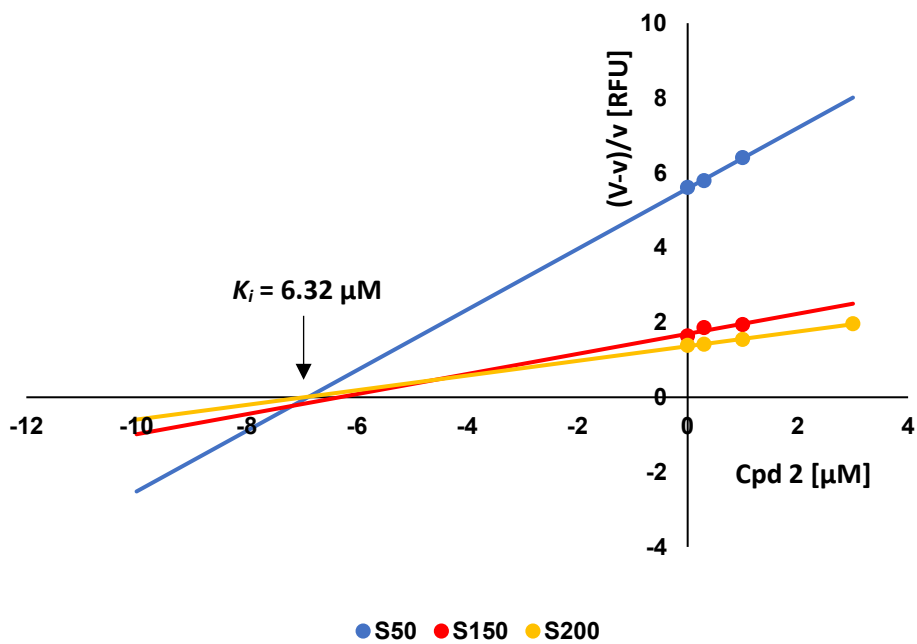

Figure S7. Dixon Plot of compound 2. The apparent  $K_i$  was determined from the intersection point of the straight lines to be  $6.32 \pm 1.27 \mu\text{M}$ .

## NMR Spectra

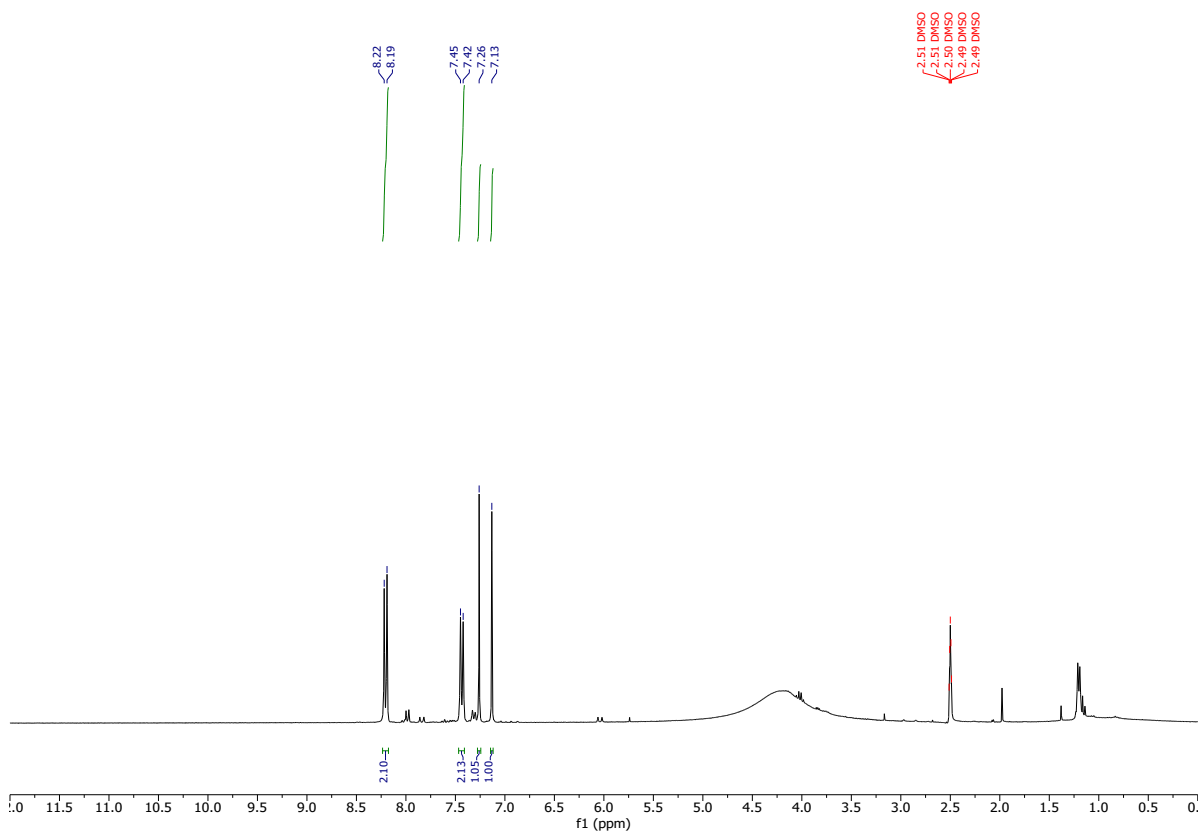

Figure S8.  $^1\text{H}$  NMR spectrum of compound 2.

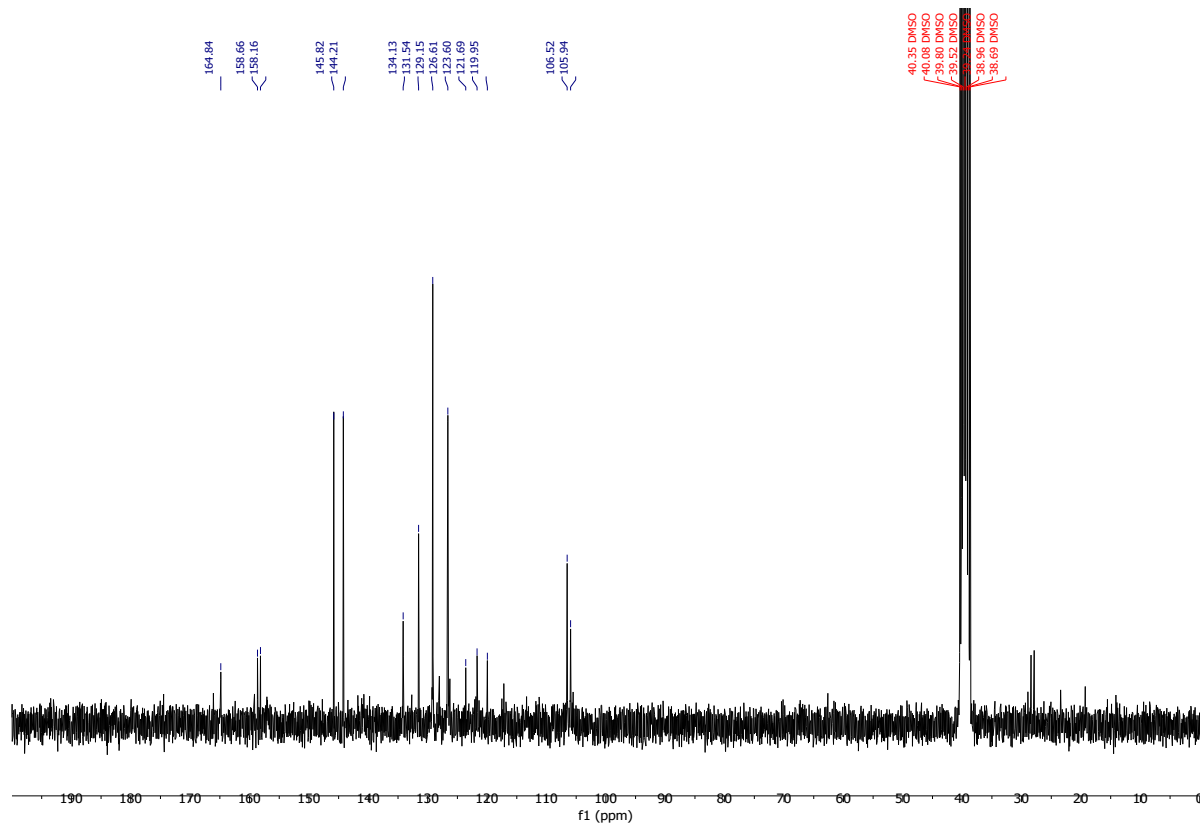

Figure S9. <sup>13</sup>C NMR spectrum of compound 2.



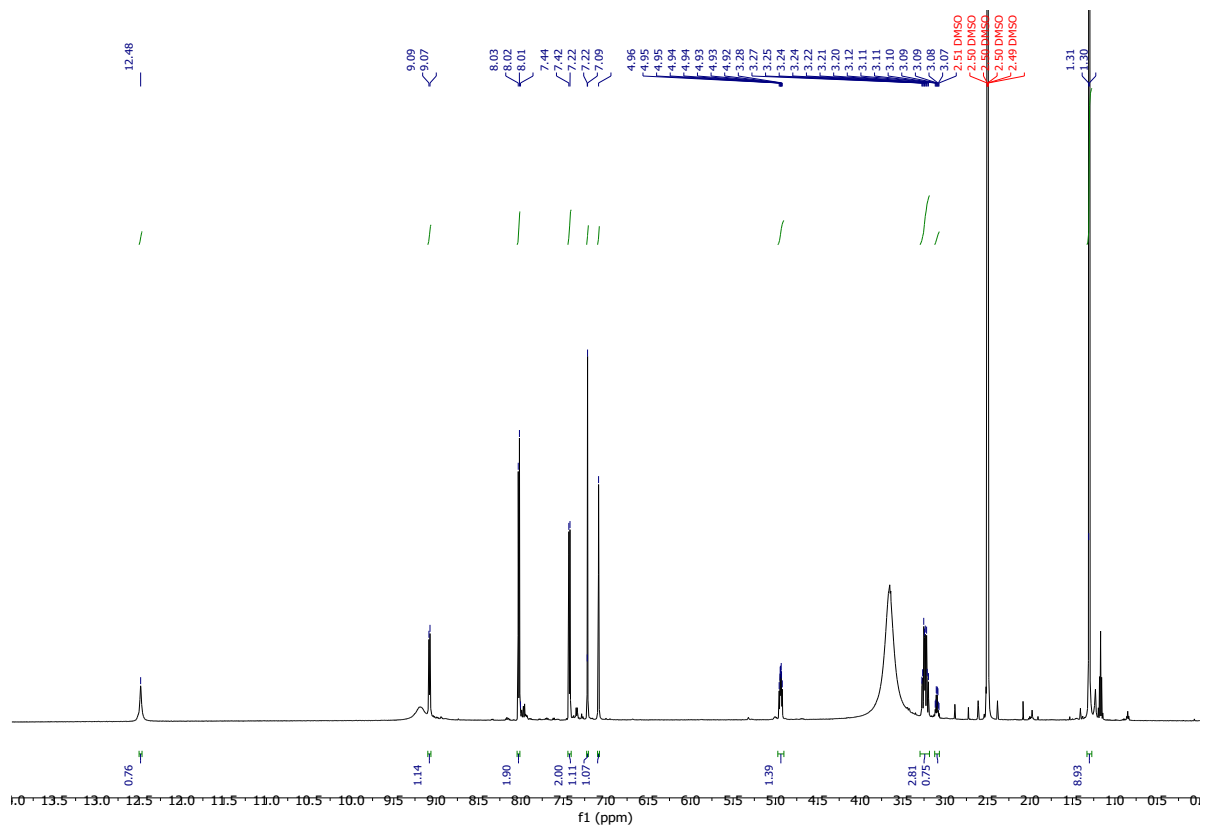

Figure S12. <sup>1</sup>H NMR spectrum of compound **3b**.

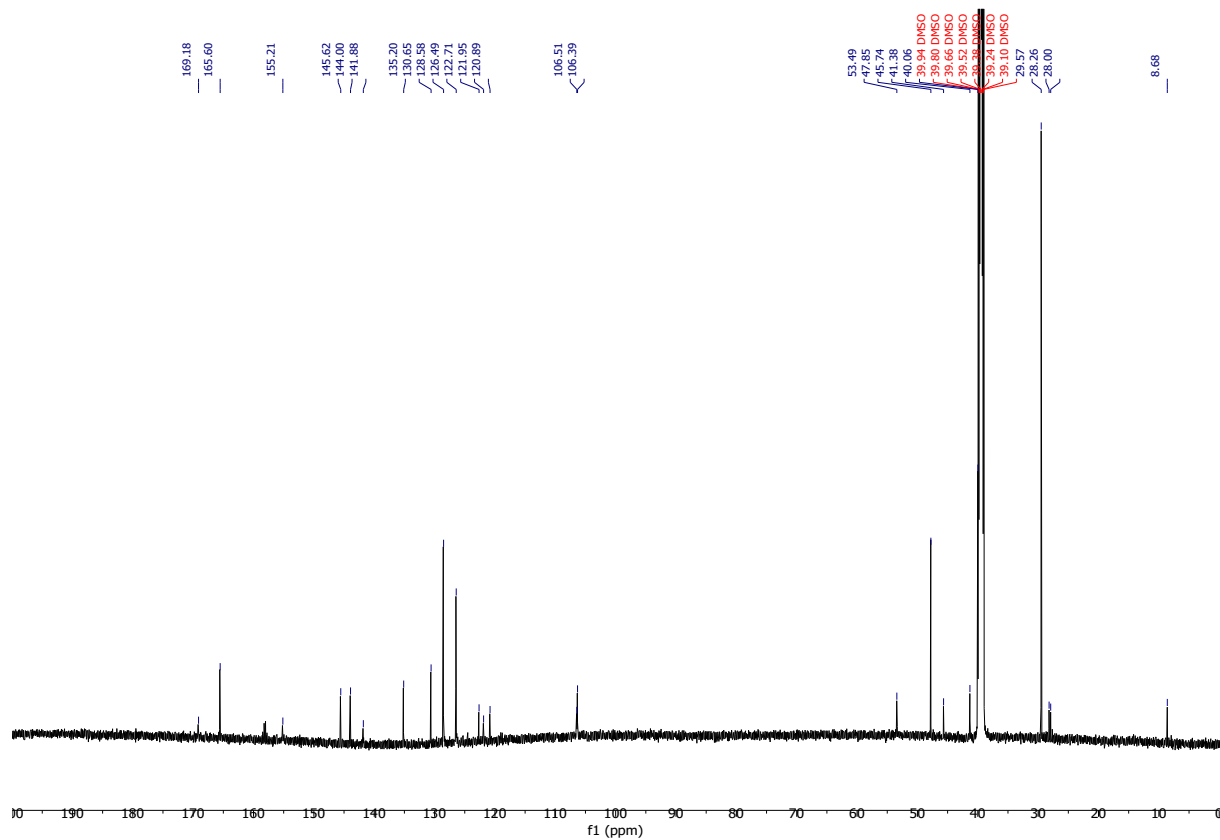

Figure S13. <sup>13</sup>C NMR spectrum of compound **3b**.





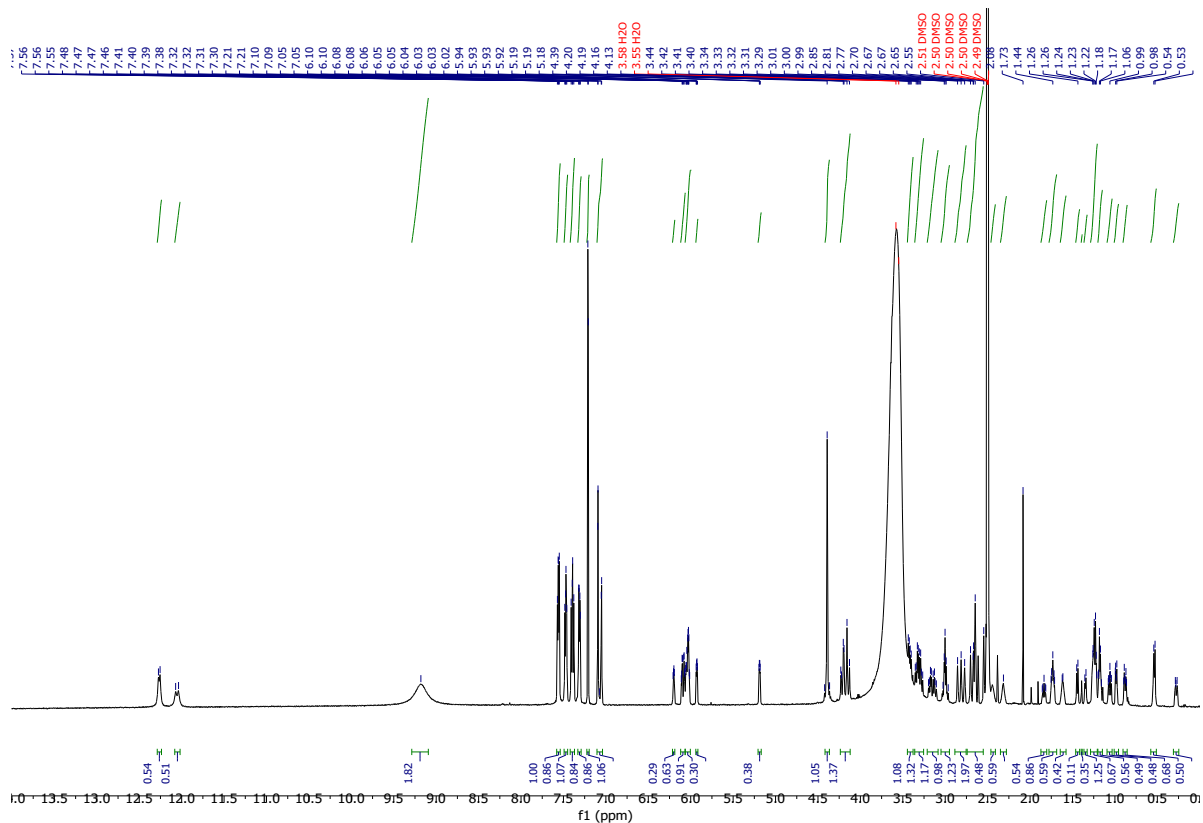

Figure S16. <sup>1</sup>H NMR spectrum of compound 4.

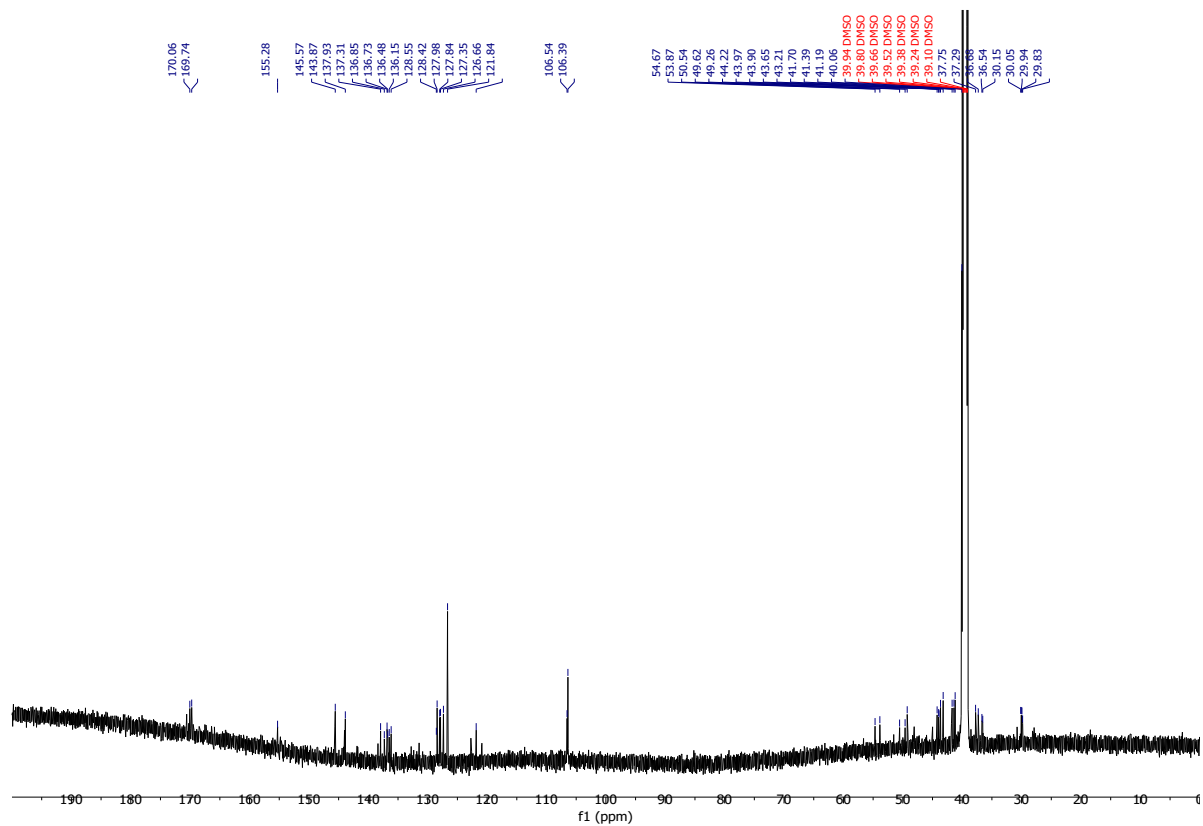

Figure S17. <sup>13</sup>C NMR spectrum of compound 4.

## HPLC Chromatograms

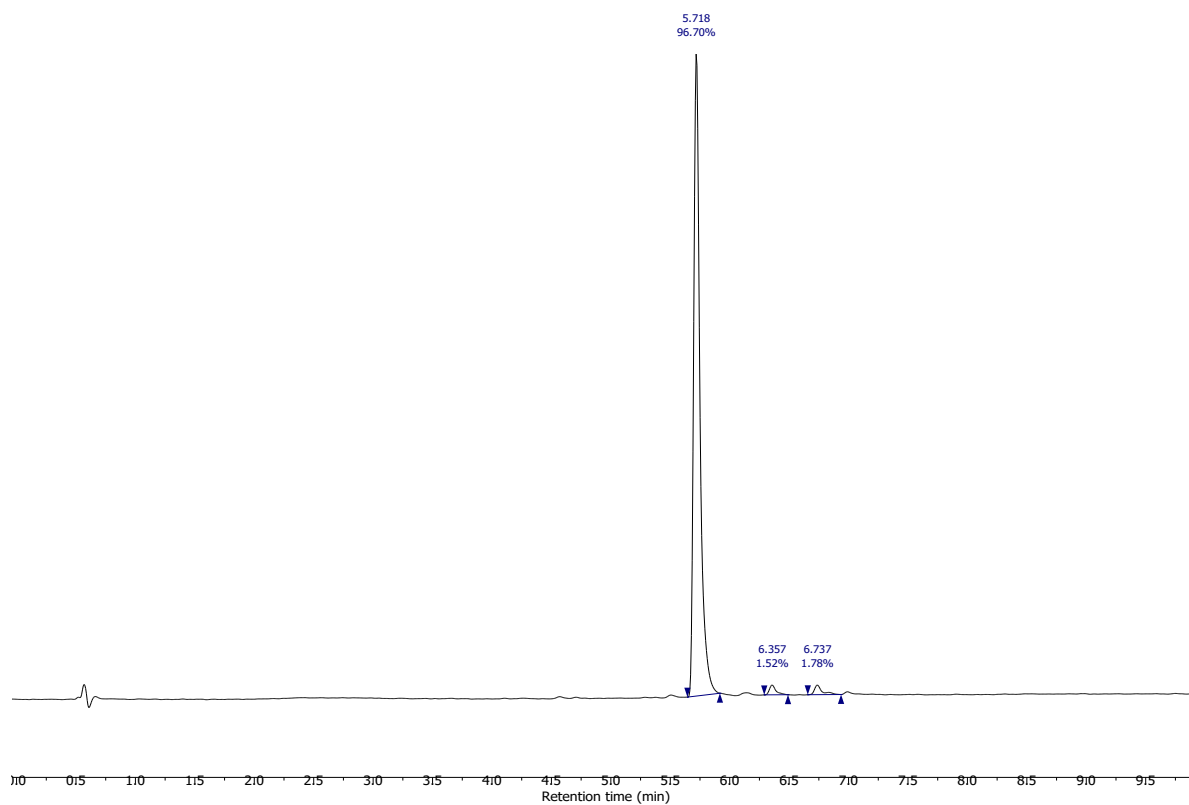

Figure S18. HPLC chromatogram of compound **2** at a wavelength of 254 nm.

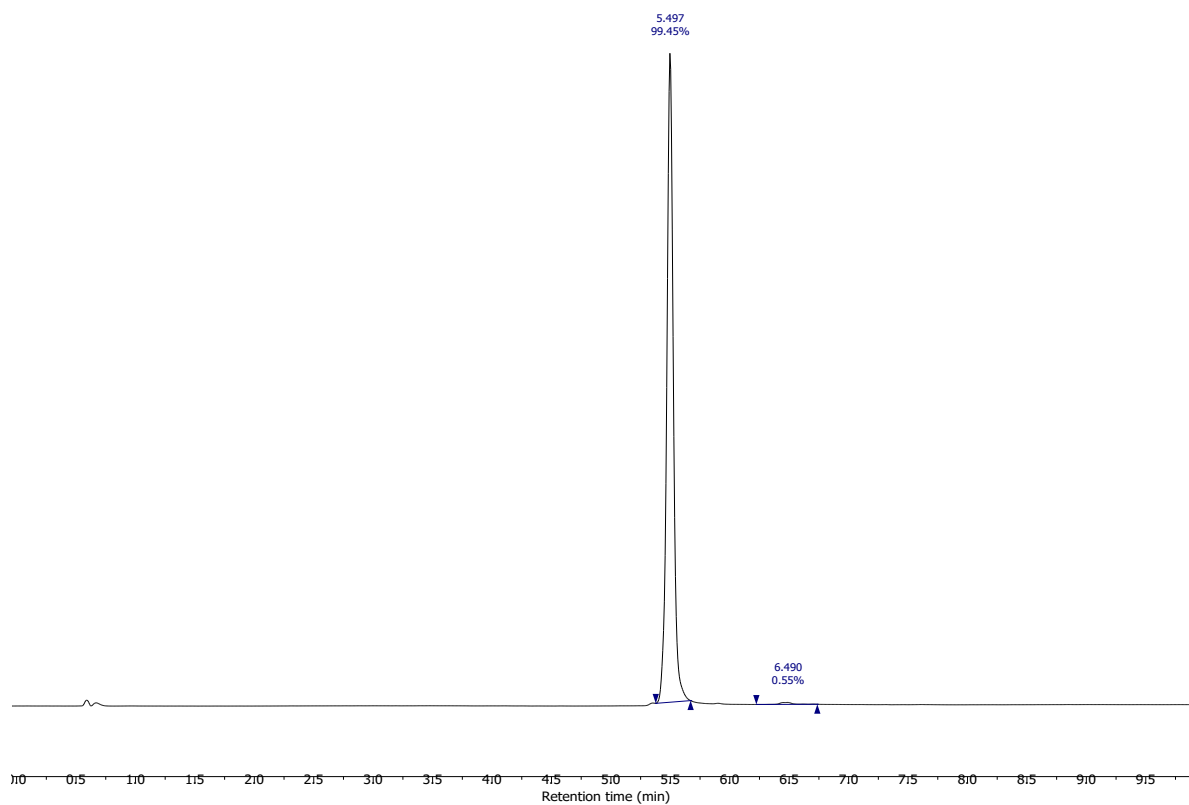

Figure S19. HPLC chromatogram of compound **3a** at a wavelength of 254 nm.

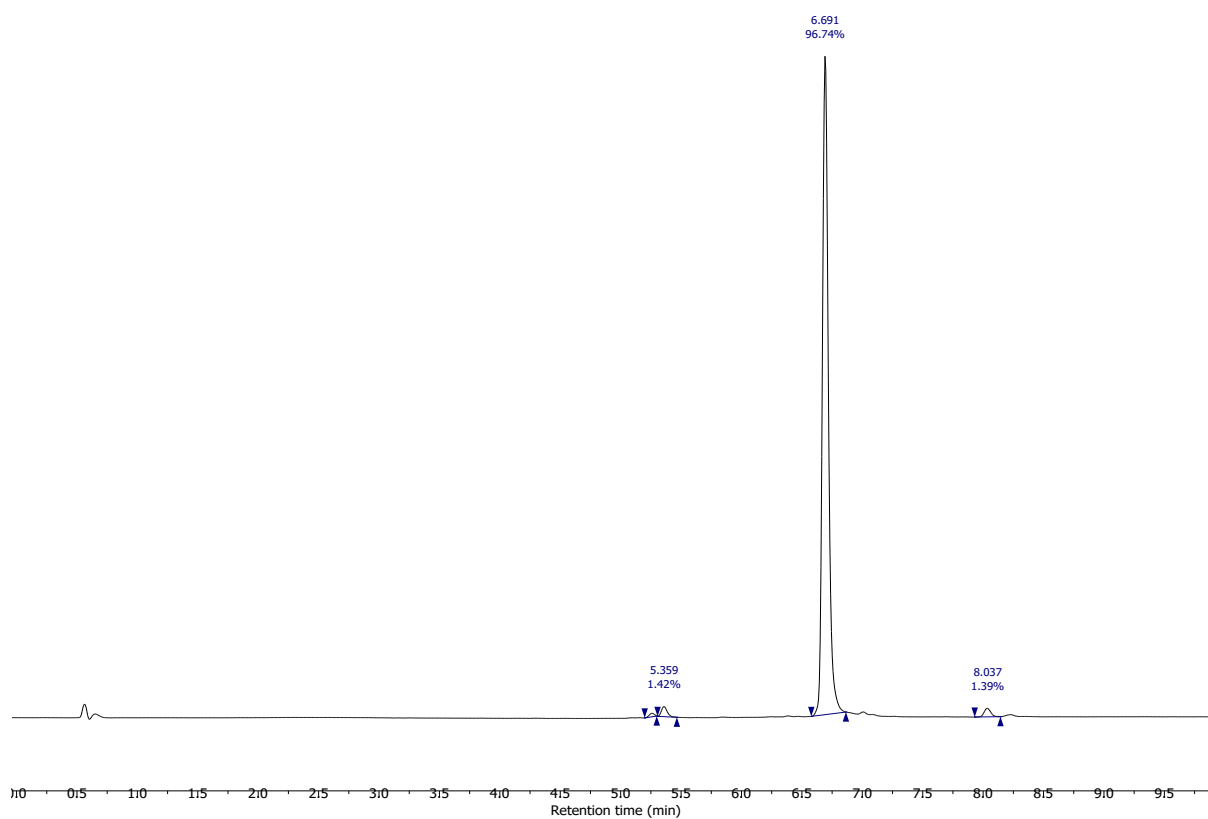

Figure S20. HPLC chromatogram of compound **3b** at a wavelength of 254 nm.

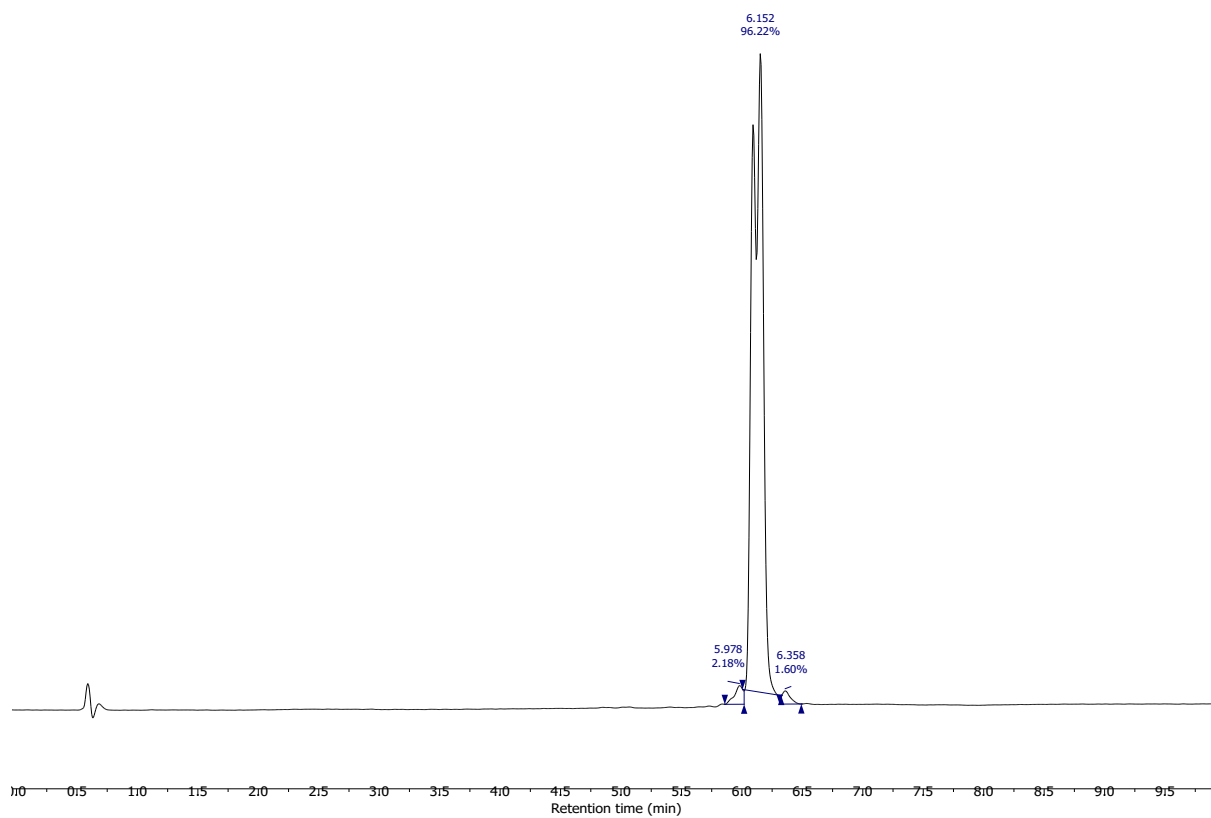

**Figure S21.** HPLC chromatogram of compound **3c** at a wavelength of 254 nm. Double peak due to the formation of diastereomers since SSMot-protecting group was used as a racemate.

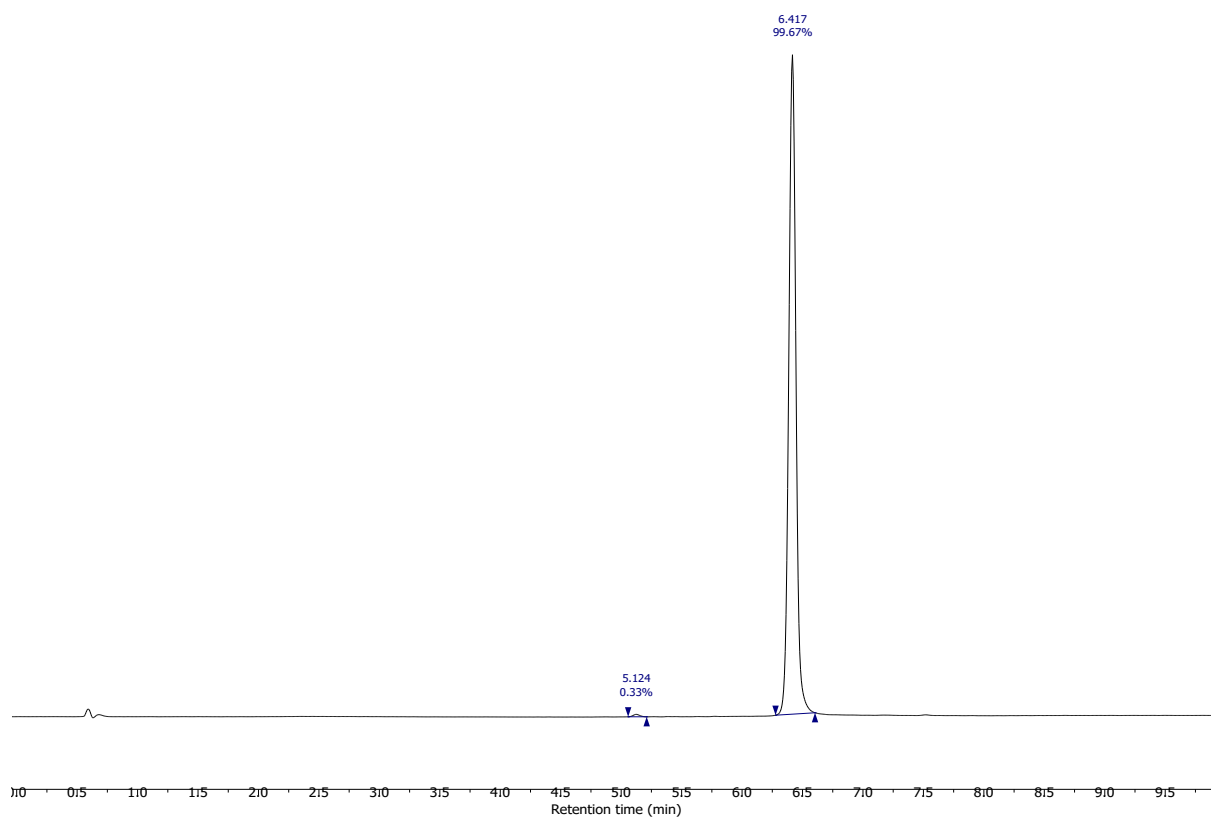

**Figure S22.** HPLC chromatogram of compound **4** at a wavelength of 254 nm.
